# Supplementary material for: Lombards on the Move – An Integrative Study of the Migration Period Cemetery at Szólád, Hungary
Source: PubMed Central journal article supplement (PMC4219681; doi:10.1371/journal.pone.0110793), 2014-11-04
Supplement: pone.0110793.s005.pdf [file pone.0110793.s005.pdf]

mt-DNA haplogroups  
and  $^{87}\text{Sr}/^{86}\text{Sr}$

K — Haplogroup  
 —  $^{87}\text{Sr}/^{86}\text{Sr}$  ratios

I Range I (0.7087 - 0.7096)

II Range II (0.7096 - 0.7100)

I/II 1 tooth range I, 1 tooth range II

↑ Both teeth > 0.7100

↓ Both teeth < 0.7087

↕ In/near range I or II and  
 $\Delta^{87}\text{Sr}/^{86}\text{Sr}_{\text{early-late}} > 0.0012$

Anthropological  
determination

 Male

 Female

 Subadult

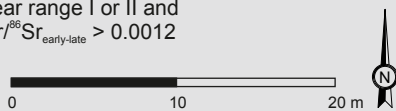

n.d.  
 44

**Figure S1:** Map of the cemetery of Szólád with indication of anthropological age and sex determinations and results of aDNA and strontium isotope analyses. The colours of the circles indicate mt-DNA haplogroups that are named above the circles. The symbols in the circles indicate the results of Sr isotope analyses. Connected individuals have identical mt-DNA haplotypes.
